# Supplementary material for: Downregulation of histone H2A and H2B pathways is associated with anthracycline sensitivity in breast cancer
Source: Breast Cancer Res. 2016 Feb 6;18:16. doi: 10.1186/s13058-016-0676-6 (PMC4744406; doi:10.1186/s13058-016-0676-6)
Supplement: Additional file 1: Figure S1. — Clinical trial BR9601 information. (a) Schematic representation. (b) Patient information. Figure S2. Entire FI network from 61 consistently changing genes. Red circles = upregulated genes; green circles = downregulated genes; diamonds = linker genes. Figure S3. Heat maps of probes for the 61 consistently changing genes. Rows are labelled with gene symbol and microarray probe IDs. (a) Raw expression values. (b) Row scaled expression values. Figure S4. Combination of pre-processing methods. The most optimal method selected was at the top(high-rank). Figure S5. Sample-by-gene heat map. Rows represent patients and columns represent genes. Both were clustered using a ward clustering algorithm. Figure S6. FI network generated from the histone module. Circles = genes within the module, diamonds = linker genes. Figure S7. Multiplot showing scaled mRNA abundance levels for each gene. A treatment-by-marker interaction Cox proportional hazards model was fit for each gene, and results are visualized on the right with the squares representing the hazard ratios (HRs) and the ends of the segments representing the 95 % confidence intervals in log2 scale. Patients are sorted by DRFS events on the x-axis and genes by decreasing log2 HR on the y-axis. Figure S8. Flow cytometric analysis of HER2 in MCF7 cells. Yellow dotted line represents HER2- cell line (MDA-MB-231), while purple dotted line shows HER2 amplified cell line (SKBR3). Green and blue solid lines represent native and epirubicin-resistant MCF7 cell lines, respectively, and show they are negative for HER2 cell surface expression. Table S1. Doubling times (in hours) of breast cancer cell lines. Table S2 List of 61 common genes with consistent differential expression across all four cell lines. Table S3. Percentage reduction in gene expression compared with non-targeting siRNA control. Table S4. Drugs targeting epirubicin-resistant breast cancer cells. Table S5. List of primary antibodies. Table S6. List of histone module gene [file 13058_2016_676_MOESM1_ESM.pdf]

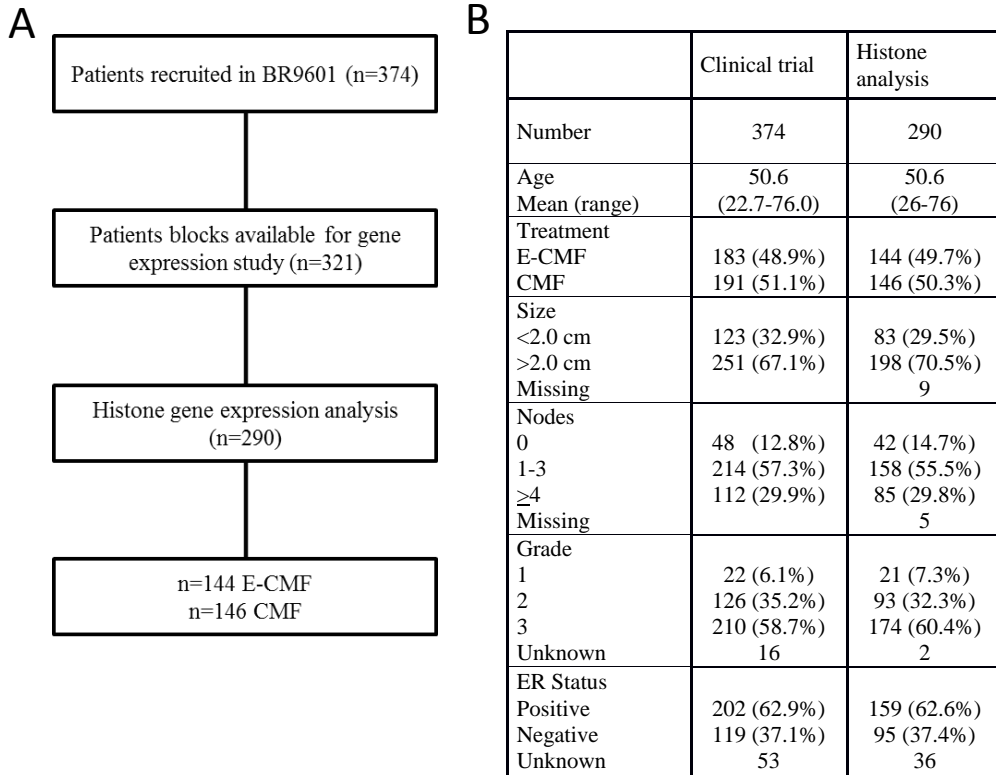

Supplementary Figure 1: Clinical trial BR9601 information. A) Schematic representation of the patient samples available for analysis. B) Patient information available for the histone analysis.



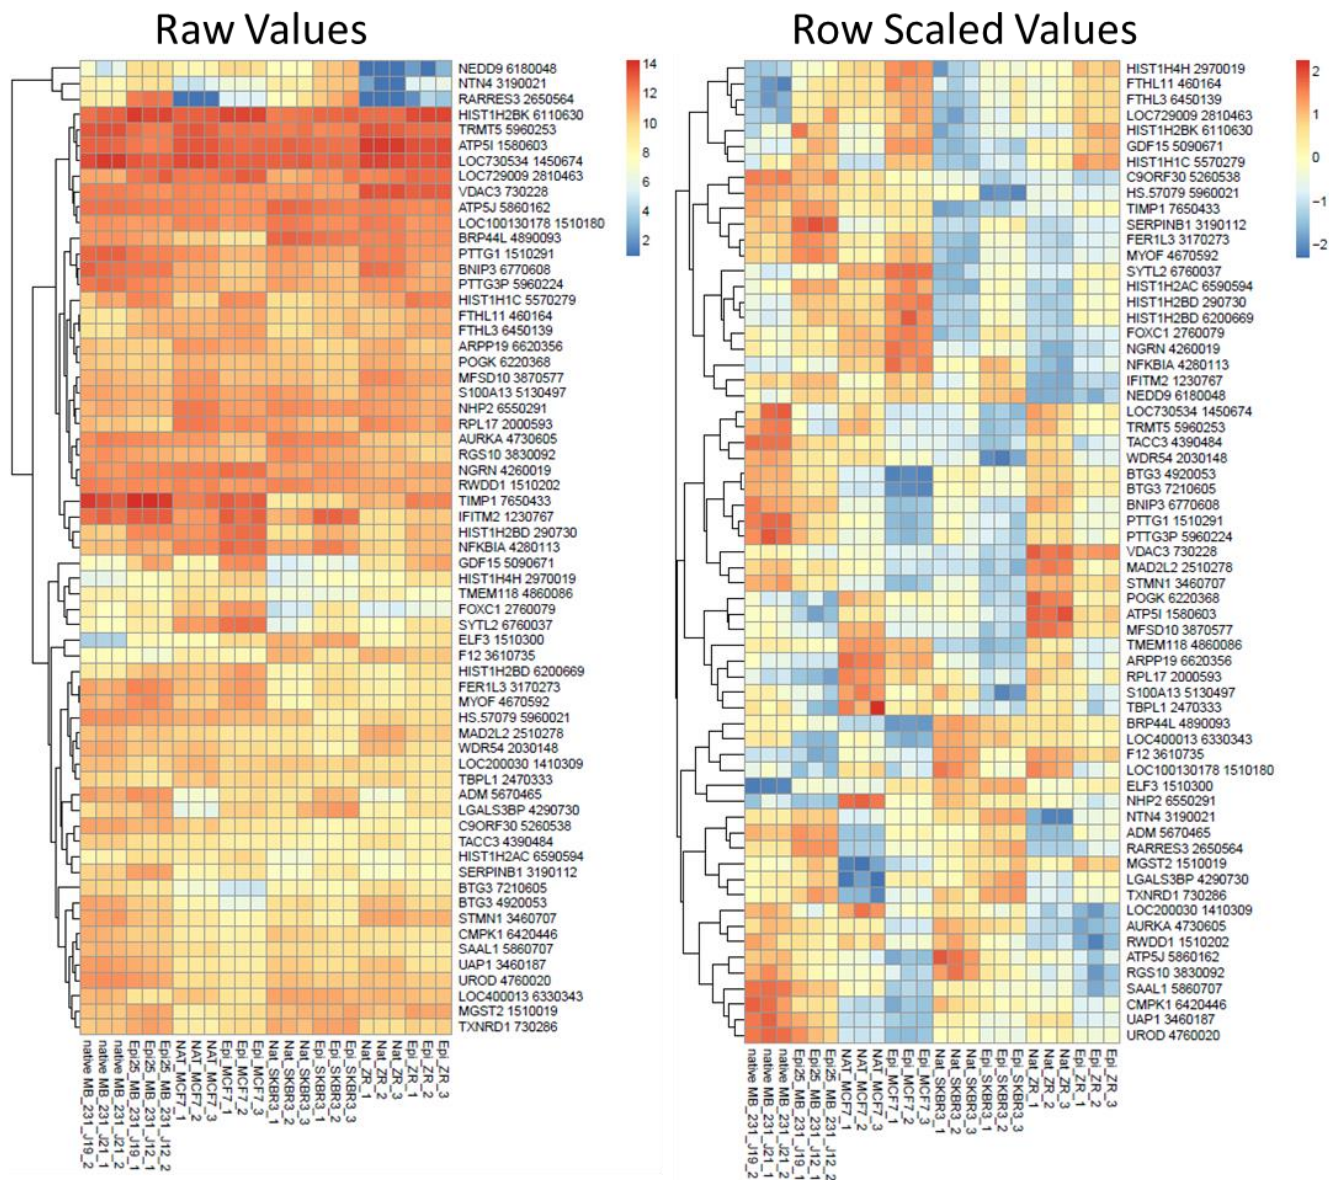

Supplementary Figure 3: Heatmaps of probes for the 61 consistently changing genes in four breast cancer cell lines. Rows labeled with gene symbol and microarray probe IDs. A) Raw expression values. B) Row scaled expression values.

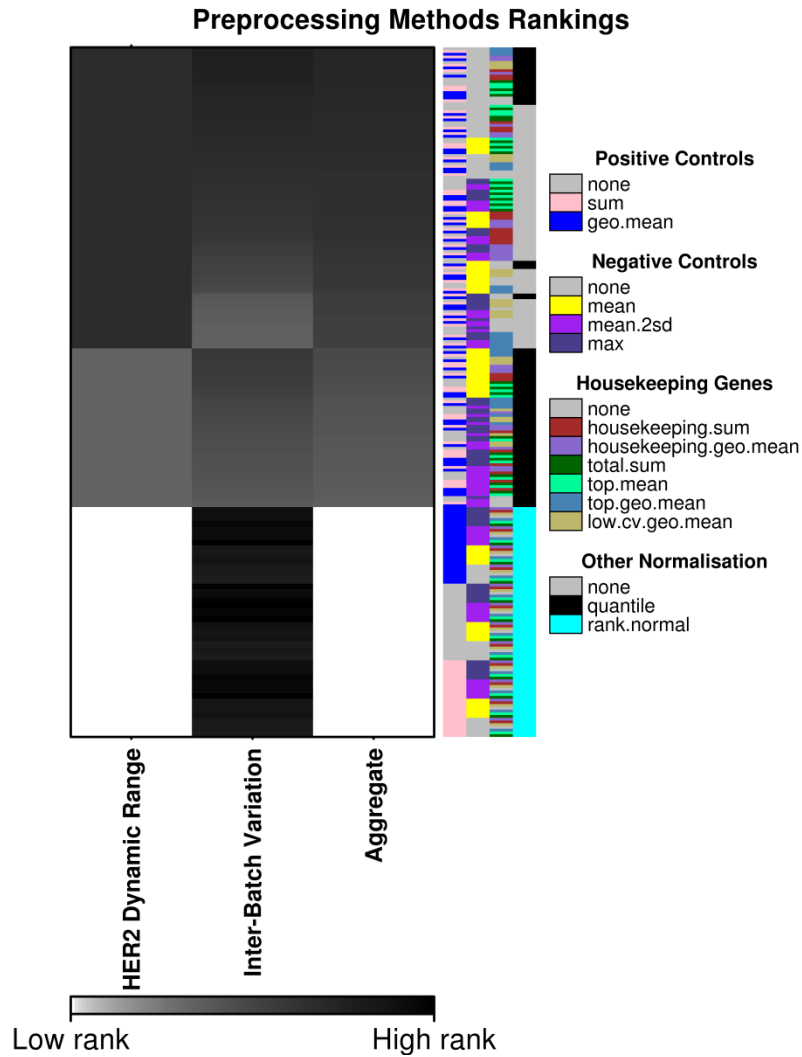

Supplementary Figure 4: Combination of pre-processing methods. The most optimal method selected was at the top, indicated by the black colour (high-rank).

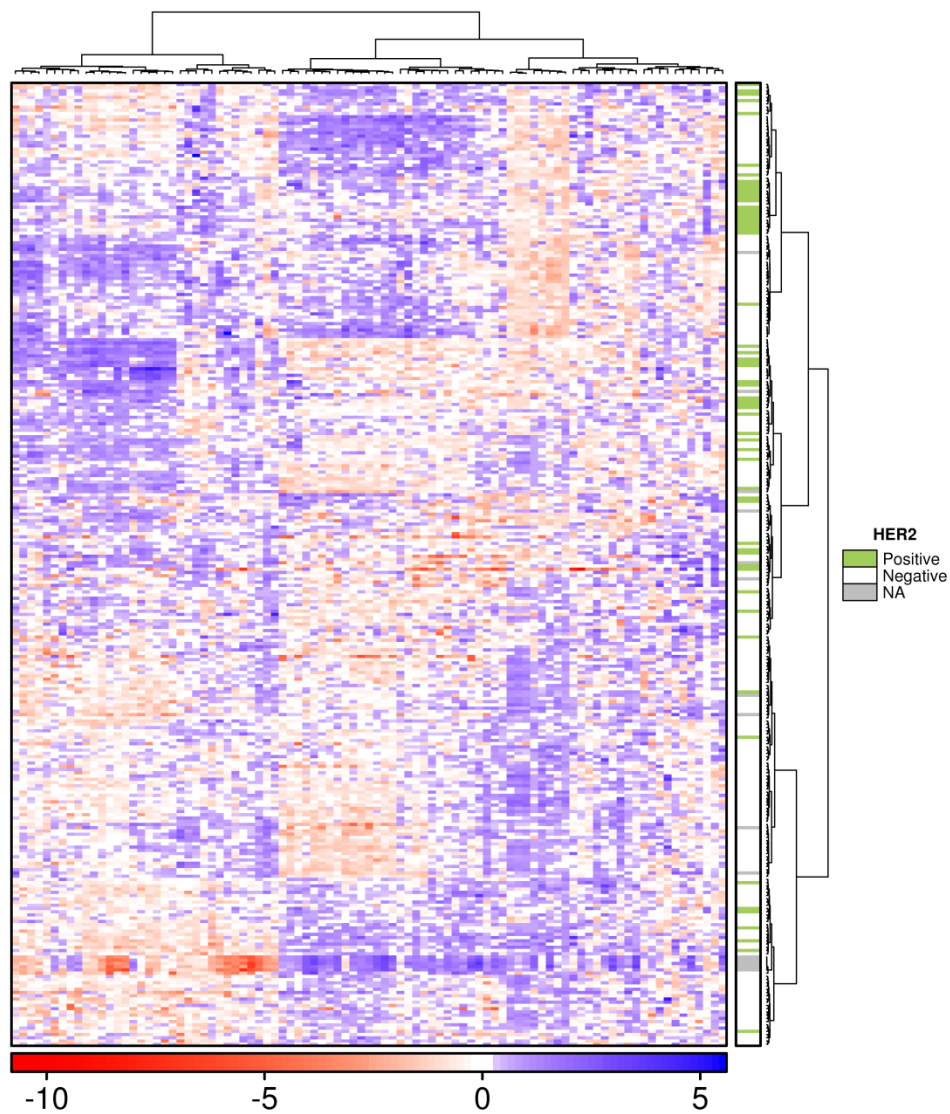

Supplementary Figure 5: Sample by gene heatmap. Rows represent patients and columns represent genes. Patients and genes are clustered using ward clustering algorithm.

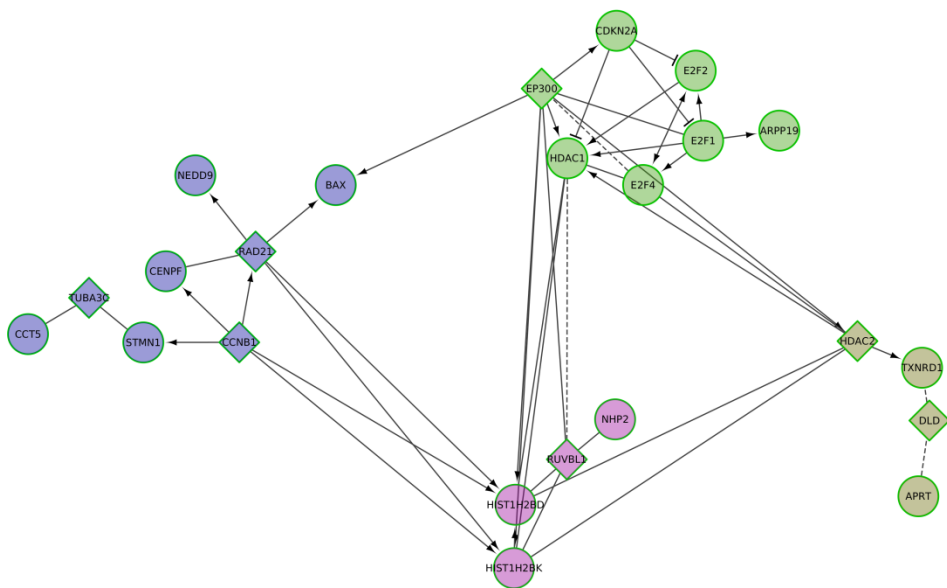

Supplementary Figure 6: Functional Interaction network generated from the histone module. Circles = genes within the module, diamonds = linker genes.

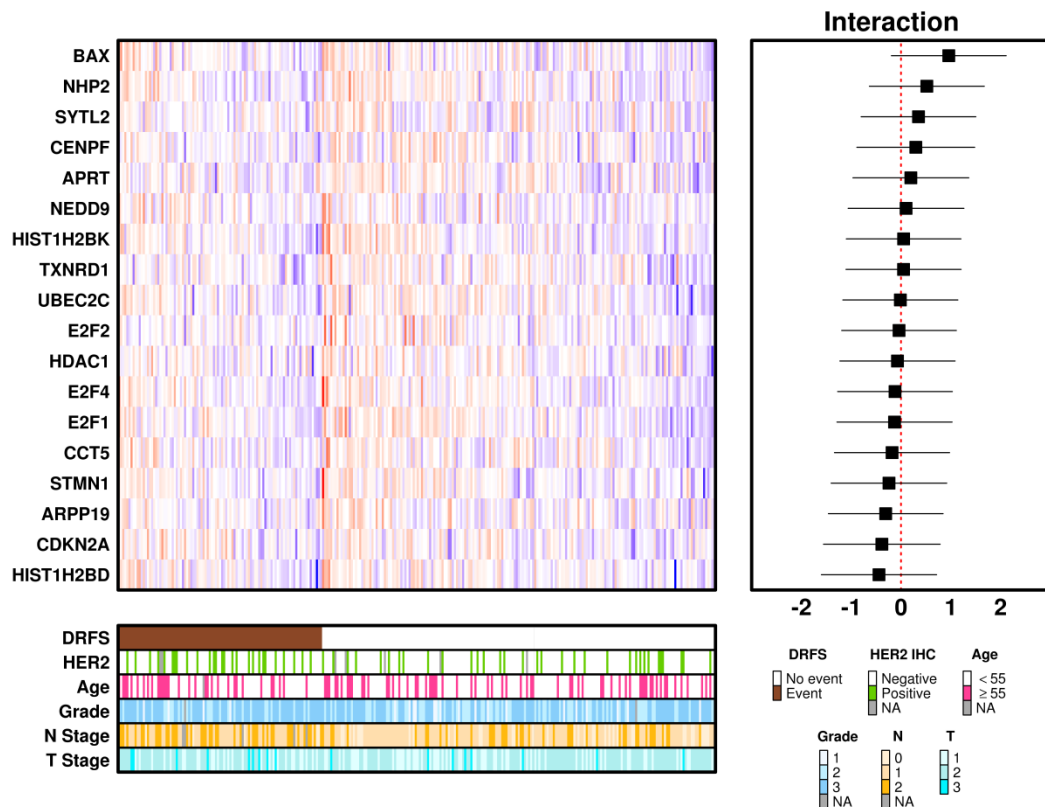

Supplementary Figure 7: Multiplot showing scaled mRNA abundance levels for each histone gene. A treatment-by-marker interaction Cox proportional hazards model was fit for each gene and results were visualized on the right with the squares representing the hazard ratios (HR) and the ends of the segments representing the 95% confidence intervals in log2 scale. Patients were sorted by DRFS events on the x-axis and genes by decreasing log2 HR on the y-axis.

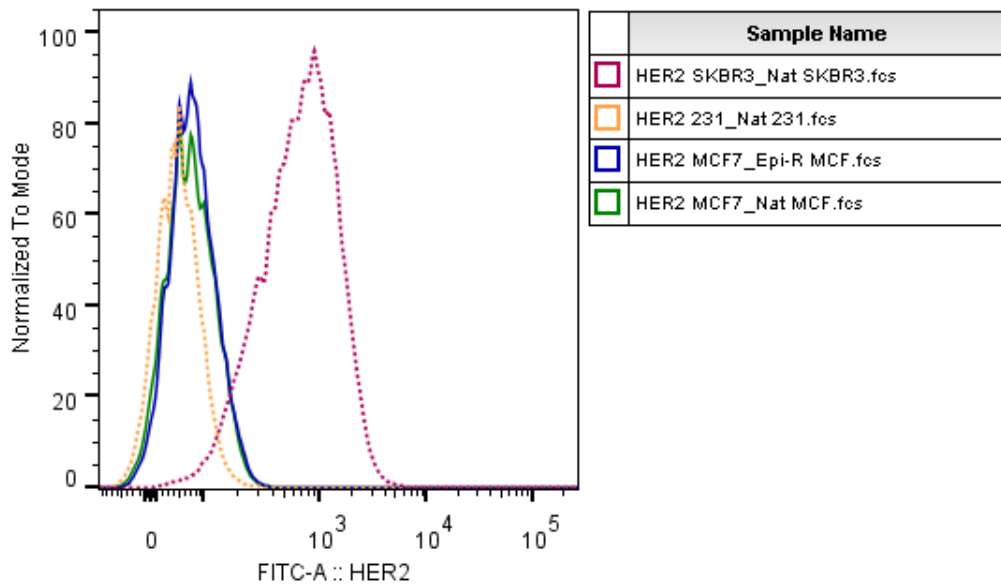

Supplementary Figure 8: Flow cytometric analysis of HER2 expression in MCF7 cells. Cells were gated by forward and side scatter. Yellow dotted line represents HER2 negative cell line (MDA-MB-231), while purple dotted line shows HER2 amplified cell line (SKBR3). Green and blue solid lines represent native and epirubicin-resistant MCF7 cell lines, respectively and show that they are negative for HER2 cell surface expression.

Supplementary Table S1: Doubling times (hours) of breast cancer cell lines

| MDA-MB-231     | - epirubicin | + 25nM epirubicin |
|----------------|--------------|-------------------|
| Native         | 25 (1.2)     | 70 (17.8)         |
| 25nM-Resistant | 40 (4.2)     | 43 (3.0)          |
| MCF7           | - epirubicin | + 30nM epirubicin |
| Native         | 29 (1.9)     | 74 (17.2)         |
| 30nM-Resistant | 43 (4.1)     | 37 (4.7)          |
| SKBR3          | - epirubicin | + 15nM epirubicin |
| Native         | 45 (3.2)     | 57 (6.6)          |
| 15nM-Resistant | 63 (2.0)     | 66 (9.2)*         |
| ZR-75-1        | - epirubicin | + 10nM epirubicin |
| Native         | 50 (8.1)     | 95 (14.2)         |
| 10nM-Resistant | 72 (15.9)    | 67 (4.0)          |

Data is based on three independent experiments and shows standard deviation in parentheses. \* Indicates data based on two experiments.

Supplementary Table S2: List of 61 common genes consistently differential across all four cell lines

| ID      | Symbol       | Direction | GeomMe: MB231_Log2FoldChange | MB231_AdjustedP | MCF7_Log2FoldChange | MCF7_AdjustedP | SKBR3_Log2FoldChange | SKBR3_AdjustedP | ZR_Log2FoldChange |              |
|---------|--------------|-----------|------------------------------|-----------------|---------------------|----------------|----------------------|-----------------|-------------------|--------------|
| 2650564 | RARRES3      | Up        | 3.148596                     | 3.653681782     | 3.63673E-06         | 4.447199806    | 4.25784E-07          | 2.768671149     | 9.64747E-05       | 2.184635223  |
| 6180048 | NEDD9        | Up        | 2.089221                     | 3.741062631     | 7.0176E-07          | 1.58242038     | 0.007340759          | 2.850554148     | 2.09226E-05       | 1.128993412  |
| 5090671 | GDF15        | Up        | 2.032681                     | 3.636941494     | 7.16273E-09         | 3.804855045    | 6.8255E-09           | 0.768664332     | 0.048864479       | 1.604966347  |
| 3190021 | NTN4         | Up        | 1.935478                     | 1.241937436     | 0.001851238         | 1.556571883    | 0.000373031          | 1.678774226     | 0.000119633       | 4.324057875  |
| 6760037 | SVTL2        | Up        | 1.52817                      | 1.1652976       | 0.000296203         | 1.011969203    | 0.001651786          | 2.500169094     | 2.23612E-08       | 1.849749141  |
| 2970019 | HIST1H4H     | Up        | 1.516285                     | 1.80342791      | 3.58277E-07         | 1.090361289    | 0.000225985          | 1.770171737     | 4.13823E-07       | 1.518585301  |
| 4290730 | LGALS3BP     | Up        | 1.481281                     | 0.682098757     | 0.047006282         | 3.964546016    | 1.12565E-09          | 1.447192416     | 0.000270078       | 1.230220759  |
| 2760079 | FOXC1        | Up        | 1.455519                     | 1.00420363      | 0.01123889          | 1.249522673    | 0.003629325          | 4.20717645      | 9.50527E-10       | 0.850186644  |
| 5670465 | ADM          | Up        | 1.387493                     | 0.487034246     | 0.009289321         | 2.638929722    | 3.75702E-11          | 1.285988414     | 4.96652E-07       | 2.24232699   |
| 1510300 | ELF3         | Up        | 1.381065                     | 3.98007561      | 2.15212E-14         | 2.091234261    | 1.12565E-09          | 0.431898221     | 0.022036181       | 1.012000235  |
| 290730  | HIST1H2BD    | Up        | 1.227323                     | 1.732788352     | 5.70725E-11         | 0.851313553    | 2.41395E-06          | 1.189402023     | 1.47803E-08       | 1.293217591  |
| 6590594 | HIST1H2AC    | Up        | 1.225358                     | 1.403406756     | 1.31934E-07         | 0.880535196    | 7.12926E-05          | 1.478714456     | 5.6782E-08        | 1.233780479  |
| 6200669 | HIST1H2BD    | Up        | 1.185078                     | 1.617462726     | 3.23951E-08         | 0.733181549    | 0.000702515          | 1.253651241     | 9.9673E-07        | 1.326676757  |
| 3190112 | SERPINB1     | Up        | 1.060114                     | 1.204186672     | 1.70104E-07         | 1.165070852    | 4.04854E-07          | 1.792280786     | 3.93893E-10       | 0.502294954  |
| 5570279 | HIST1H1C     | Up        | 1.023357                     | 1.027453541     | 0.000193176         | 1.856791331    | 2.39596E-07          | 0.528988612     | 0.032349843       | 1.086769647  |
| 4670592 | MYOF         | Up        | 0.911692                     | 0.777614107     | 8.6546E-05          | 1.094263174    | 2.23886E-06          | 1.477305039     | 2.15583E-08       | 0.549587044  |
| 1230767 | IFITM2       | Up        | 0.882348                     | 0.438443858     | 0.04703333          | 1.239747977    | 1.64764E-05          | 1.681706166     | 1.94374E-07       | 0.663073931  |
| 3170273 | FER1L3       | Up        | 0.877948                     | 0.804031756     | 9.7142E-05          | 0.80661503     | 0.000141542          | 1.634891191     | 9.81454E-09       | 0.56033448   |
| 7650433 | TIMP1        | Up        | 0.793399                     | 0.595283591     | 0.019559902         | 0.545339978    | 0.040652461          | 0.96714379      | 0.0006404         | 1.262073349  |
| 2810463 | LOC729009    | Up        | 0.785447                     | 1.539336581     | 9.8671E-07          | 0.505607019    | 0.035900992          | 0.883796598     | 0.000571234       | 0.553310958  |
| 6450139 | FTHL3        | Up        | 0.752148                     | 1.565607318     | 7.05118E-09         | 0.350509492    | 0.041522483          | 0.923646946     | 8.82241E-06       | 0.631428946  |
| 6110630 | HIST1H2BK    | Up        | 0.711506                     | 0.861411469     | 1.9905E-06          | 0.663913117    | 7.01773E-05          | 0.494068326     | 0.00096232        | 0.906997373  |
| 460164  | FTHL1        | Up        | 0.680375                     | 1.356498845     | 1.0086E-06          | 0.466130773    | 0.029280065          | 0.587851408     | 0.005957661       | 0.576499038  |
| 730286  | TXNRD1       | Up        | 0.66486                      | 0.828723276     | 0.000140939         | 1.032238709    | 1.88443E-05          | 0.47312385      | 0.015299184       | 0.482787056  |
| 4280113 | NFKBIA       | Up        | 0.603038                     | 0.443885758     | 0.018039201         | 0.602469714    | 0.003460198          | 0.664679665     | 0.001174192       | 0.743979416  |
| 1510019 | MGST2        | Up        | 0.588832                     | 0.690699027     | 0.000233532         | 0.888303429    | 2.37996E-05          | 0.356187337     | 0.035432188       | 0.550092348  |
| 4260019 | NGRN         | Up        | 0.285379                     | 0.284273928     | 0.017492979         | 0.286069278    | 0.023278031          | 0.278236487     | 0.022885132       | 0.293131687  |
| 4920053 | BTG3         | Down      | 1.057953                     | -0.994500313    | 7.60336E-08         | -2.052756871   | 2.71104E-12          | -0.707227434    | 6.47272E-06       | -0.867687244 |
| 2030148 | WDR54        | Down      | 0.937605                     | -0.697640144    | 4.99278E-05         | -0.695295447   | 7.93894E-05          | -1.225403064    | 3.19761E-08       | -1.300169246 |
| 7210605 | BTG3         | Down      | 0.914882                     | -0.782708938    | 0.000186404         | -1.882321708   | 4.30457E-09          | -0.52243878     | 0.006715335       | -0.910188702 |
| 3610735 | F12          | Down      | 0.821478                     | -0.668310659    | 0.001690483         | -0.731457558   | 0.001186424          | -1.698184733    | 3.15993E-08       | -0.548568688 |
| 3460707 | STMN1        | Down      | 0.776332                     | -0.881249308    | 2.49829E-06         | -1.06145713    | 3.28522E-07          | -0.990321397    | 5.10112E-07       | -0.392113403 |
| 6770608 | BNIP3        | Down      | 0.728782                     | -0.355313963    | 0.012030965         | -0.896084604   | 2.45297E-06          | -0.707030937    | 3.06142E-05       | -1.253116563 |
| 5960224 | PTTG3P       | Down      | 0.638443                     | -0.594570863    | 0.000701649         | -0.713277749   | 0.000185456          | -0.622173213    | 0.000517861       | -0.62967301  |
| 1510291 | PTTG1        | Down      | 0.608276                     | -0.586131618    | 0.000147683         | -0.878266532   | 1.99227E-06          | -0.459314456    | 0.001625214       | -0.578990073 |
| 3460187 | UAP1         | Down      | 0.605505                     | -0.609999942    | 7.63221E-05         | -0.345489059   | 0.013592559          | -0.530382744    | 0.000344145       | -1.202591574 |
| 6330343 | LOC400013    | Down      | 0.6027                       | -1.497139045    | 2.5147E-10          | -1.197130666   | 1.29734E-08          | -0.255806511    | 0.04764818        | -0.287799173 |
| 4390484 | TACC3        | Down      | 0.593789                     | -0.626709097    | 0.000129782         | -0.657393468   | 0.00011824           | -0.283671092    | 0.049577036       | -1.063709121 |
| 2000593 | RP117        | Down      | 0.577395                     | -0.588811817    | 0.005418746         | -0.501744259   | 0.020892276          | -0.70368187     | 0.001591708       | -0.534634337 |
| 5260538 | C9ORF30      | Down      | 0.576402                     | -0.369061183    | 0.031841007         | -0.719125251   | 0.000377899          | -0.781155377    | 0.000113485       | -0.532427825 |
| 3870577 | MFS10        | Down      | 0.574913                     | -0.393204338    | 0.000955945         | -1.018383073   | 1.6896E-08           | -0.445862974    | 0.000332799       | -0.611895834 |
| 2470333 | TBP1         | Down      | 0.569527                     | -0.790059852    | 0.000223837         | -0.516164639   | 0.010887416          | -0.392221311    | 0.041959994       | -0.657777182 |
| 4890093 | BRP44L       | Down      | 0.552822                     | -0.509230881    | 0.00013697          | -0.918490682   | 1.64274E-07          | -0.472373824    | 0.000320624       | -0.422733179 |
| 3830092 | RGS10        | Down      | 0.551694                     | -0.599276133    | 0.001336879         | -0.482359577   | 0.009910653          | -0.633949005    | 0.000933824       | -0.505522085 |
| 5860707 | SAAL1        | Down      | 0.543692                     | -0.441887147    | 0.001870805         | -0.905719329   | 1.26247E-06          | -0.301083107    | 0.027747176       | -0.725135442 |
| 5130497 | S100A13      | Down      | 0.537715                     | -0.3731618      | 0.022268267         | -0.532321743   | 0.003150339          | -1.025263414    | 2.1919E-06        | -0.410489866 |
| 2510278 | MAD2L2       | Down      | 0.518602                     | -0.314700606    | 0.022350536         | -0.720882199   | 3.15681E-05          | -0.3321464      | 0.019159199       | -0.959945984 |
| 4860086 | TMEM118      | Down      | 0.510012                     | -0.431073739    | 0.00618594          | -0.357621648   | 0.026680875          | -0.32636258     | 0.036611528       | -1.344764073 |
| 5960253 | TRMT5        | Down      | 0.496152                     | -0.864734207    | 6.53683E-07         | -0.668965367   | 2.47573E-05          | -0.279863322    | 0.028979187       | -0.374305702 |
| 1410309 | LOC200030    | Down      | 0.478234                     | -0.681366125    | 0.000102772         | -0.79004931    | 3.01351E-05          | -0.312093958    | 0.0420401         | -0.311344924 |
| 5960021 | HS.57079     | Down      | 0.471627                     | -0.300585974    | 0.014673571         | -0.285037365   | 0.02698542           | -2.070268939    | 8.65337E-13       | -0.278931657 |
| 6620356 | ARPP19       | Down      | 0.442397                     | -0.321869883    | 0.014853613         | -0.302991326   | 0.028320302          | -0.528950623    | 0.000357123       | -0.742545896 |
| 1580603 | ATP5I        | Down      | 0.442257                     | -0.627441919    | 2.37616E-06         | -0.414234377   | 0.000397532          | -0.296398647    | 0.005183639       | -0.496595444 |
| 6420446 | CMKP1        | Down      | 0.441949                     | -0.750473772    | 3.8767E-05          | -0.335178786   | 0.034964112          | -0.456565239    | 0.004452136       | -0.332179689 |
| 1510180 | LOC100130178 | Down      | 0.439856                     | -0.261347038    | 0.012650558         | -0.491648564   | 9.41264E-05          | -0.488091279    | 7.03782E-05       | -0.596857031 |
| 1450674 | LOC730534    | Down      | 0.424832                     | -0.682052148    | 8.45419E-06         | -0.525804233   | 0.000237981          | -0.283328604    | 0.022515347       | -0.320580401 |
| 4760020 | UROD         | Down      | 0.409187                     | -0.475845157    | 0.000536956         | -0.438340937   | 0.001666825          | -0.40946835     | 0.002206143       | -0.328237685 |
| 4730605 | AURKA        | Down      | 0.408034                     | -0.281668226    | 0.042610896         | -0.969683657   | 1.02828E-06          | -0.291324158    | 0.042601704       | -0.348371698 |
| 6550291 | NHP2         | Down      | 0.376524                     | -0.235508145    | 0.046581381         | -0.930566464   | 2.15841E-07          | -0.276751743    | 0.024576203       | -0.33138139  |
| 1510202 | RWDD1        | Down      | 0.362583                     | -0.239714468    | 0.046435999         | -0.469491498   | 0.000779742          | -0.509735867    | 0.000256759       | -0.301275026 |
| 6220368 | POGK         | Down      | 0.338358                     | -0.226483407    | 0.034515599         | -0.310872883   | 0.00784246           | -0.389836437    | 0.001038556       | -0.477536144 |

Supplementary Table S3: Percent reduction in gene expression compared to non-targeting siRNA control

|                   | MDA-MB-231 Epi-R    |                    | ZR-75-1 Epi-R       |                    |
|-------------------|---------------------|--------------------|---------------------|--------------------|
|                   | H2AC expression     | H2BK expression    | H2AC expression     | H2BK expression    |
| siH2AC            | 24.4 ( $\pm 3.2$ )  | -                  | 27.5 ( $\pm 0.16$ ) | -                  |
| siH2BK            | -                   | 12.2 ( $\pm 2.5$ ) | -                   | 5.7 ( $\pm 1.44$ ) |
| siH2BA and siH2BK | 40.7 ( $\pm 10.9$ ) | 12.2 ( $\pm 3.7$ ) | 52.8 ( $\pm 0.99$ ) | 7.9 ( $\pm 2.25$ ) |

Supplementary Table S4: Drugs targeting epirubicin-resistant breast cancer cells

| Drug status            |  | Drug name                  | IC <sub>50</sub> values (μM) |           |         |          |           |            |          |           |
|------------------------|--|----------------------------|------------------------------|-----------|---------|----------|-----------|------------|----------|-----------|
|                        |  |                            | MCF7 Nat                     | MCF7 EpiR | 231 Nat | 231 EpiR | SKBR3 Nat | SKBR3 EpiR | ZR75 Nat | ZR75 EpiR |
| Phase III              |  | Panobinostat (LBH-589)     | 0.01                         | 0.01      | 0.02    | 0.01     | 0.02      | 0.07       | 0.01     | 0.02      |
| Phase II               |  | Quisinostat (JNJ-26481585) | 0.01                         | 0.01      | 0.01    | 0.01     | 0.01      | 0.22       | 0.01     | 0.01      |
| Phase II               |  | Givinostat (ITF2357)       | 0.10                         | 0.08      | 0.26    | 0.16     | 0.22      | 2.74       | 0.17     | 0.18      |
| Phase II               |  | Abexinostat (PCI-24781)    | 0.11                         | 0.09      | 0.27    | 0.12     | 0.21      | 2.25       | 0.14     | 0.16      |
| Phase II               |  | Pracinostat (SB939)        | 0.16                         | 0.12      | 0.54    | 0.18     | 0.26      | 0.92       | 0.15     | 0.23      |
| Phase II               |  | Belinostat (PX-105684)     | 0.25                         | 0.20      | 0.50    | 0.18     | 0.21      | 0.15       | 0.36     | 0.46      |
| Phase II               |  | Mocetinostat (MGCD0103)    | 0.32                         | 0.41      | 0.85    | 0.43     | 1.00      | 3.69       | 0.35     | 0.43      |
| Preclinical            |  | Apicidin A (OSI-2040)      | 0.07                         | 0.11      | 0.23    | 0.11     | 0.17      | 2.21       | 0.21     | 0.25      |
| Preclinical            |  | CAY10603 (ST-2-92)         | 0.61                         | 0.38      | 1.27    | 0.82     | 0.44      | 1.03       | 0.98     | 0.75      |
| Preclinical            |  | Oxamflatin (107-0130)      | 0.62                         | 0.25      | 0.59    | 0.29     | 1.28      | 0.69       | 0.68     | 1.20      |
| Preclinical            |  | Trichostatin A             | 1.18                         | 0.50      | 0.33    | 0.15     | 1.52      | 1.24       | 1.83     | 2.28      |
| Preclinical            |  | Scriptaid                  | 1.34                         | 0.72      | 3.81    | 1.30     | 1.25      | 0.94       | 1.66     | 1.23      |
| Tool compound          |  | CBHA                       | 1.18                         | 3.58      | 2.39    | 1.75     | 1.45      | 1.03       | 2.94     | 2.25      |
| Discontinued - Phase I |  | Dacinostat (LAQ824)        | 0.02                         | 0.01      | 0.04    | 0.02     | 0.02      | 0.06       | 0.02     | 0.02      |

Supplementary Table S5: List of primary antibodies

| <b>Antibody</b>      | <b>Vendor</b>             | <b>Clone</b>       |
|----------------------|---------------------------|--------------------|
| anti-EGFR            | Santa Cruz Biotech        | A-10               |
| anti-PR              | Dako                      | PgR 636            |
| anti-HER2            | Cell Signaling Technology | Polyclonal (#2242) |
| anti-HER3            | Dako                      | DAK-H3-IC          |
| anti-ER $\alpha$     | Novocastra/Leica          | ER 6F11            |
| anti-MDR1            | Santa Cruz Biotech        | G-1                |
| anti-TOPOII $\alpha$ | Cell Signaling Technology | D10G9              |
| anti-H2A             | Cell Signaling Technology | Polyclonal (#2578) |
| anti-H2B             | Cell Signaling Technology | 53H3               |
| anti-actin           | Calbiochem                | JLA20              |
| anti-GAPDH           | Cell Signaling Technology | D16H11             |

Supplementary Table S6: List of histone module genes in the Nanostring codeset

|           |
|-----------|
| HIST1H2BK |
| HIST1H2BD |
| NEDD9     |
| SYTL2     |
| NHP2      |
| ARPP19    |
| TXNRD1    |
| CENPF     |
| STMN1     |
| CCT5      |
| APRT      |
| UBEC2C    |
| BAX       |
| HDAC1     |
| E2F1      |
| E2F2      |
| E2F4      |
| CDKN2A    |
